# Supplementary material for: Integrated chemical and genetic screens unveil FSP1 mechanisms of ferroptosis regulation
Source: PubMed Central journal article supplement (PMC10643123; doi:10.1038/s41594-023-01136-y), 2023-11-13

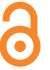

# **Integrated chemical and genetic screens unveil FSP1 mechanisms of ferroptosis regulation**

---

In the format provided by the authors and unedited

## Supplementary Fig. 1

An example of the gating strategy for lipid peroxidation assay using C11-BODIPY

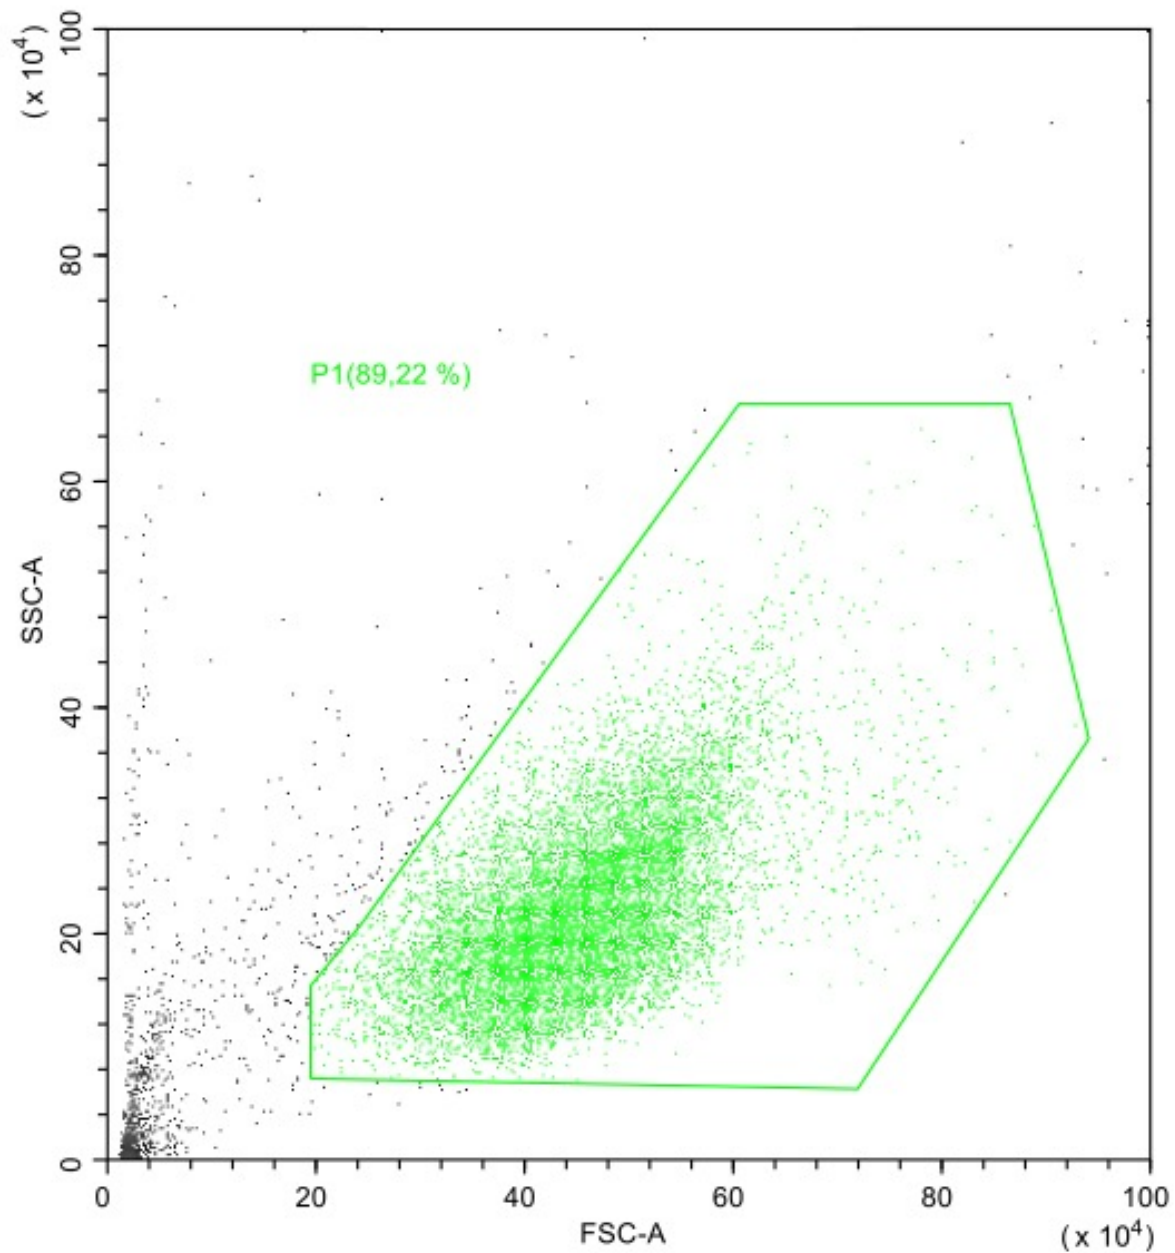

### Supplementary Fig.1

An example of the gating strategy for lipid peroxidation assay using C11-BODIPY  
Green area was considered as viable cells and analyzed.

## Supplementary Fig. 2

Extended data Fig. 2c

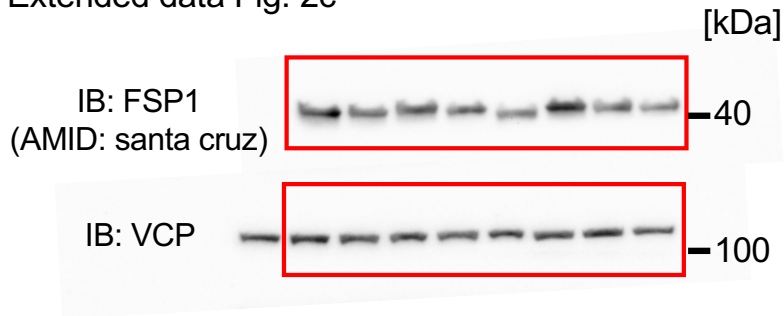

Extended data Fig. 3a

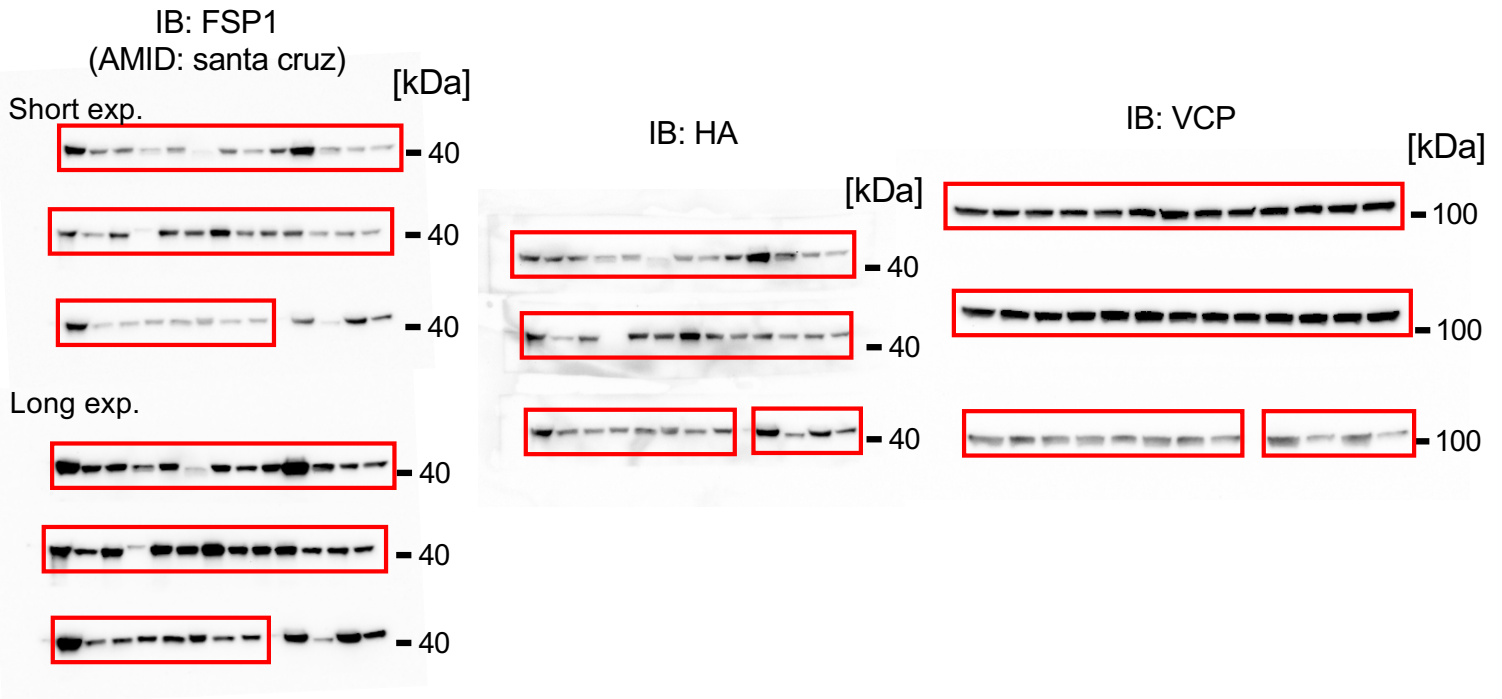

Extended data Fig. 3e

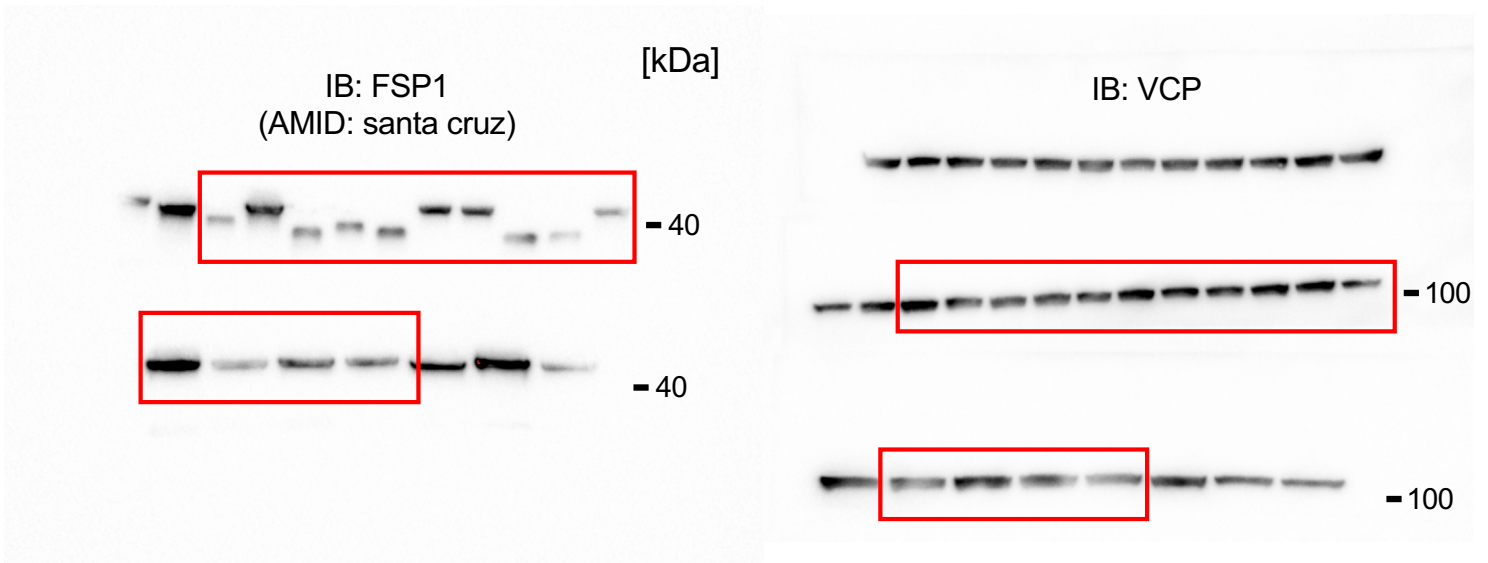

## Supplementary Fig.2

Raw images of immunoblotting with a molecular marker were shown. Red area were cropped for visualization.

## Supplementary Fig. 2

Extended data Fig. 4a

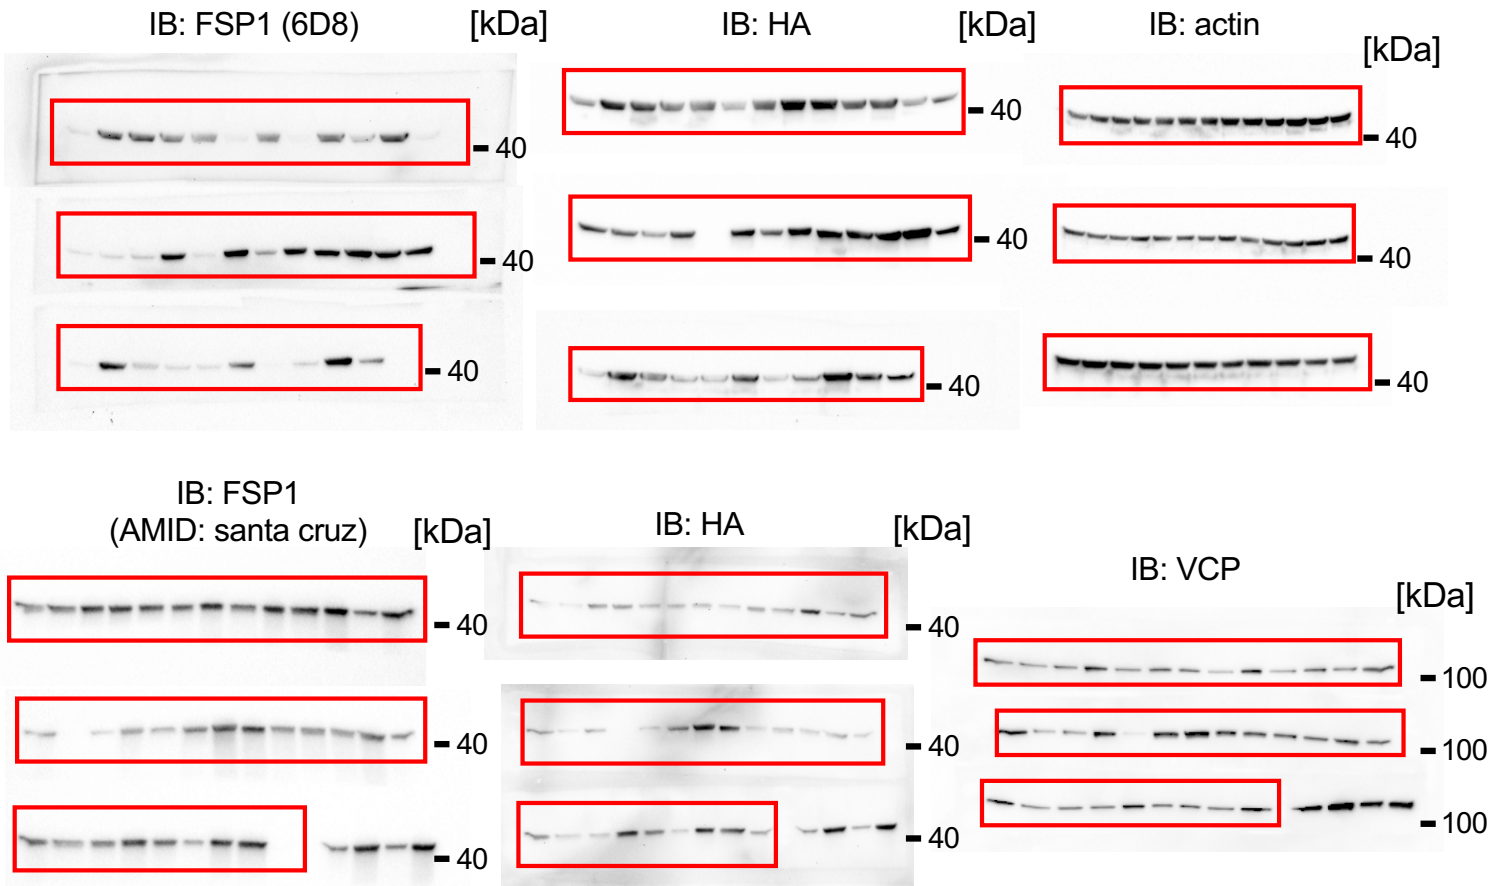

Extended data Fig. 4b& 7d

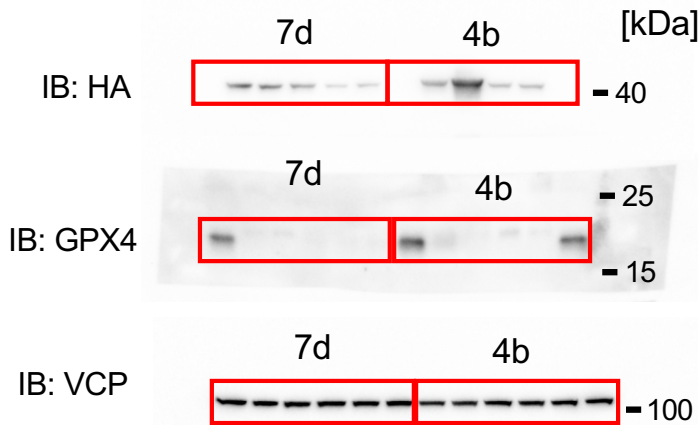

Extended data Fig. 4g

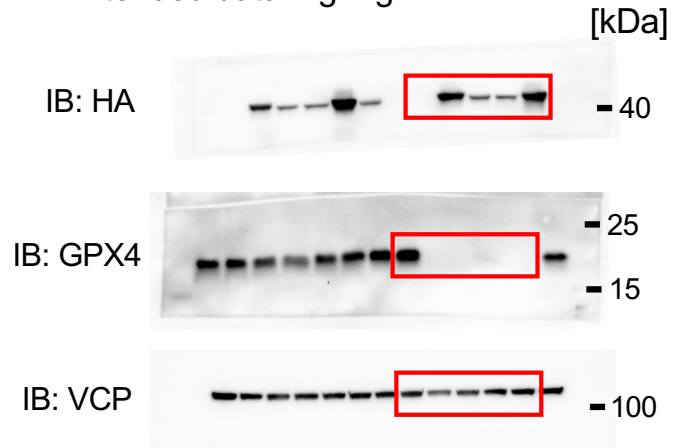

Extended data Fig. 4c

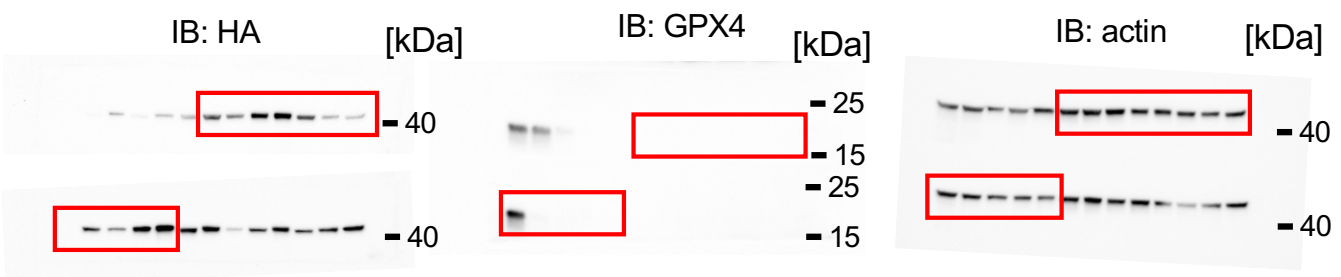

Supplementary Fig.2 (continued)

Extended data Fig. 6c

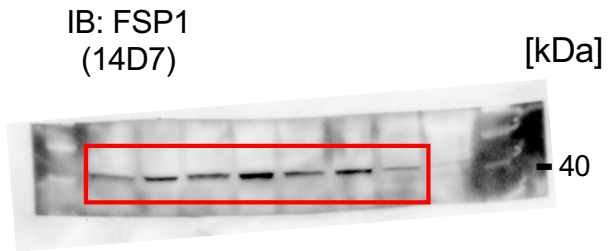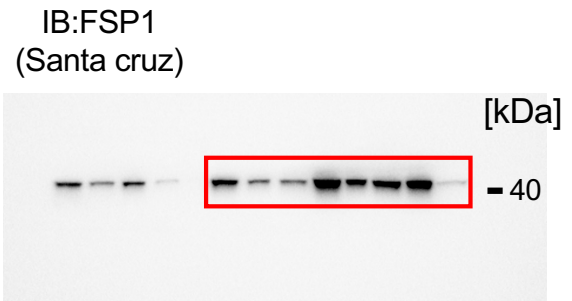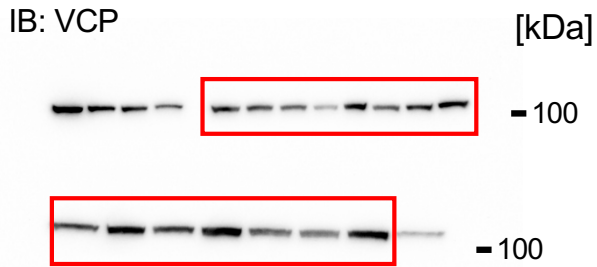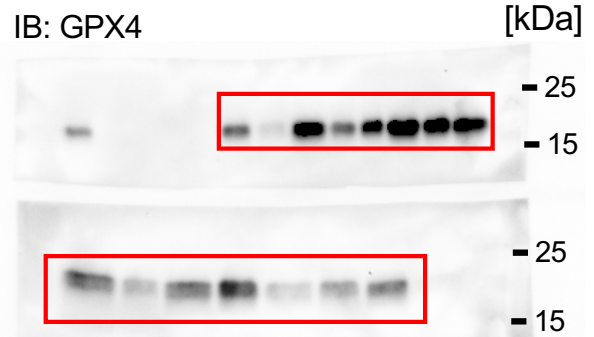

Extended data Fig. 6e (left)

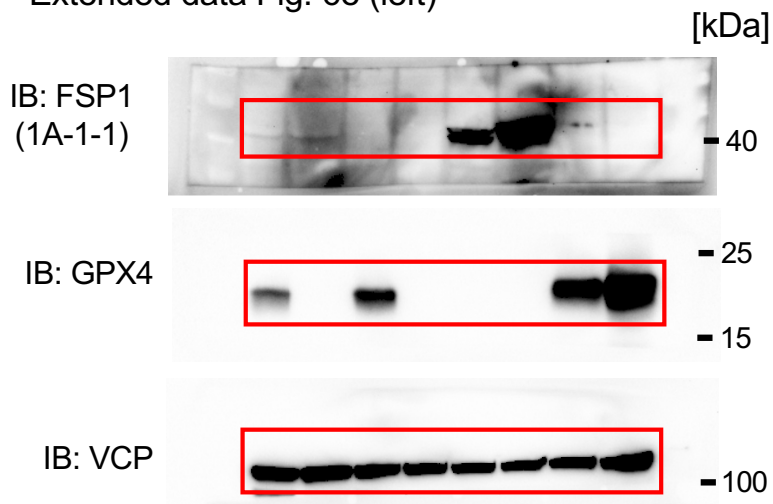

Extended data Fig. 6e (right)

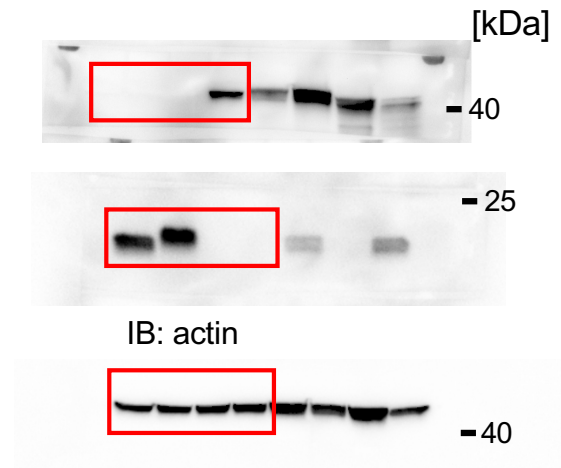

Extended data Fig. 6e (middle)

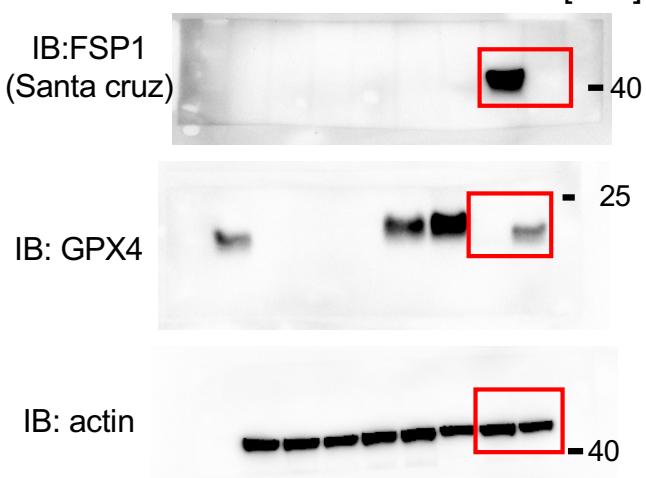

Extended data Fig. 6h

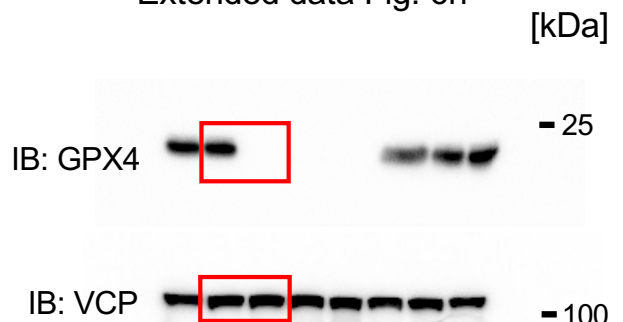

Supplement: 41594_2023_1136_MOESM1_ESM.pdf [file 41594_2023_1136_MOESM1_ESM.pdf]
